# Supplementary material for: Early (5-Day) Onset of Diabetes Mellitus Causes Degeneration of Photoreceptor Cells, Overexpression of Incretins, and Increased Cellular Bioenergetics in Rat Retina
Source: MDPI journal article supplement (doi:10.3390/cells10081981), 2021-08-04
Supplement: s1 [file s1]

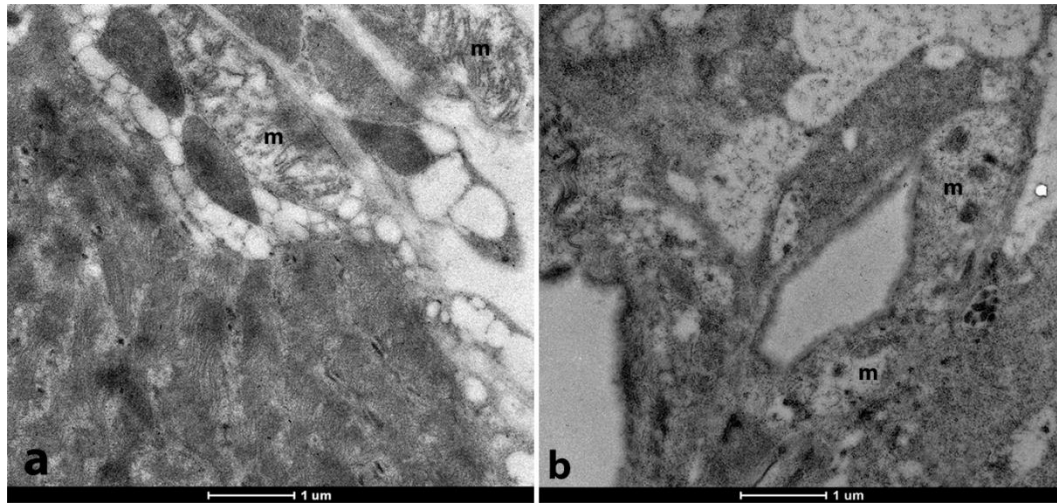

**Figure S1.** Representative electron micrographs of photoreceptors cells in the retina of non-diabetic controls (**a**) and diabetic (**b**) rats. Note that mitochondria (m) are intact in non-diabetic controls, while those of diabetic rats have lost their cristae (degenerated). Scale bar = 1  $\mu$ m.
